# Supplementary material
Source: publisher site journal article supplement (https://www.dovepress.com/article/449897)
Supplement: Supplementary file 1 [file get_supplementary_file.php]

**Supplement Table.** The association between Groups and 3-month worse functional outcome (mRS shift) in MT-treated acute ischemic stroke patients. (Multivariable Ordinal Logistic Regression)

| Group | Unadjusted | | | Model 1* | | | Model 2† | | |
| --- | --- | --- | --- | --- | --- | --- | --- | --- | --- |
| OR (95%Cl) | *P* value | *P* for trend | OR (95%Cl) | *P* value | *P* for trend | OR (95%Cl) | *P* value | *P* for trend |
| Poor outcome |  |  | 0.033 |  |  | 0.210 |  |  | 0.099 |
| Group 1 | Reference |  |  | Reference |  |  | Reference |  |  |
| Group 2 | 1.10(0.57-2.13) | 0.044 |  | 1.20(0.61-2.36) | 0.252 |  | 1.17(0.56-2.42) | 0.434 |  |
| Group 3 | 1.82(0.87-3.81) | 0.736 |  | 1.57(0.74-3.34) | 0.935 |  | 2.17(0.94-5.03) | 0.707 |  |
| Group 4 | 2.58(1.23-5.39) | 0.079 |  | 2.24(1.07-4.69) | 0.131 |  | 2.72(1.13-6.54) | 0.209 |  |
| Group 5 | 2.59(0.89-7.57) | 0.267 |  | 2.05(0.69-6.08) | 0.467 |  | 4.30(1.02-18.26) | 0.118 |  |
